# Supplementary material for: Resveratrol overcomes gefitinib resistance by increasing the intracellular gefitinib concentration and triggering apoptosis, autophagy and senescence in PC9/G NSCLC cells
Source: Springer Nature journal article supplement (doi:10.1038/srep17730), 2015-12-04
Supplement: 41598_2015_BFsrep17730_MOESM1_ESM.pdf [file 41598_2015_BFsrep17730_MOESM1_ESM.pdf]

Supplementary information for:

**Resveratrol overcomes gefitinib resistance by increasing the intracellular gefitinib concentration and triggering apoptosis, autophagy and senescence in PC9/G NSCLC cells**

**Yinsong Zhu, Wenjuan He, Xiujuan Gao, Bin Li, Chenghan Mei, Rong Xu, Hui Chen**

# Supplementary Figure S1

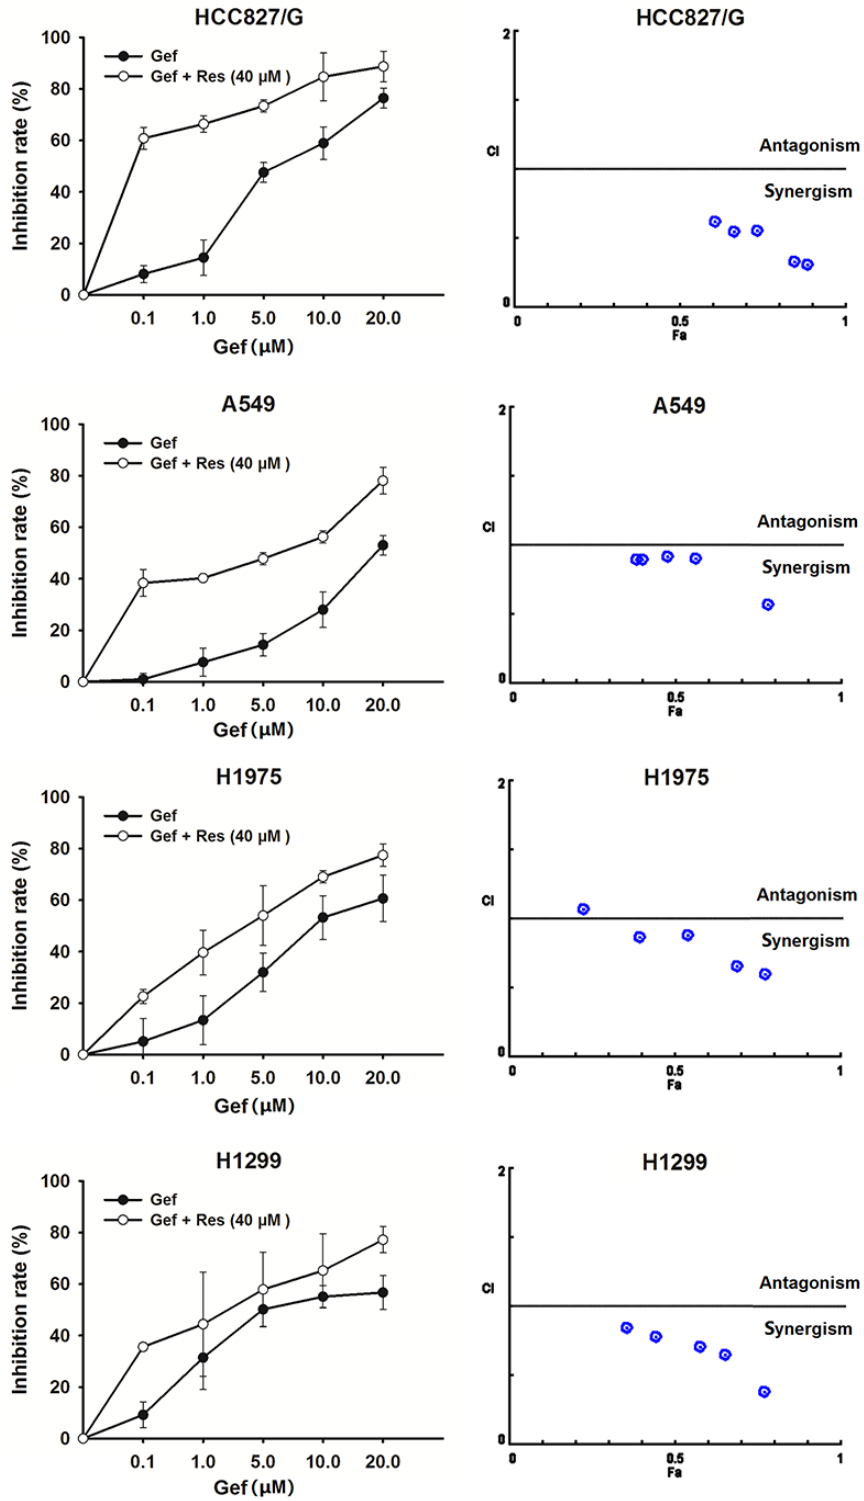

**Supplementary Figure S1. The synergistic antiproliferative effects of Res and Gef in NSCLC cells.** HCC827/G (A), A549 (B), H1975 (C), and H1299 (D) cells were plated in 96-well plates and cultured in the presence of the indicated concentrations of Gef, alone or in combination with a fixed concentration of Res (40  $\mu$ M) for 72 h. The viability of cells were assayed by MTT assay. Data are shown as means  $\pm$ SD of three independent experiments. The CI values for Res and Gef in different cells were determined according to the Chou-Talalay's method. CI < 0.9, CI = 0.9 – 1.1, and CI > 1.1 indicated synergistic, additive and antagonistic effects, respectively.

## Supplementary Table S1

| Cell lines | EGFR mutation | K-Ras | Gef IC <sub>50</sub> (μM) | Res IC <sub>50</sub> (μM) |
|------------|---------------|-------|---------------------------|---------------------------|
| PC9        | delE746-A750  | WT    | 0.021 ±0.005              | 82.50 ±10.04              |
| PC9/G      | delE746-A750  | WT    | 6.54 ±0.58                | 33.90 ±1.60               |
| HCC827     | delE746-A750  | WT    | 0.014 ±0.008              | 73.44 ±4.32               |
| HCC827/G   | delE746-A750  | WT    | 5.61 ±1.48                | 42.94 ±3.54               |
| A549       | WT            | G12S  | 17.35 ±3.96               | 72.39 ±2.76               |
| H1975      | L858R/T790M   | WT    | 11.52 ±2.93               | 74.59 ±2.03               |
| H1299      | WT            | WT    | 7.08 ±1.23                | 88.84 ±1.62               |

**Supplementary Table S1. The characteristics of NSCLC cell lines and the IC<sub>50</sub> values of Gef and Res.** The IC<sub>50</sub> values for Gef > 1 μM was defined as Gef-resistant in NSCLC cell lines. Data are shown as means ±SD of three independent experiments.

## Supplement Table S2

| siRNA          | Sequences                                                                      |
|----------------|--------------------------------------------------------------------------------|
| CYP1A1 siRNA-1 | Sense: 5'-CCUUCACCCUCAUCAGUAATT-3'<br>Antisense: 5'-UUACUGAUGAGGGUGAAGGTT-3'   |
| CYP1A1 siRNA-2 | Sense: 5'-CCUAGUCAACCUGAAUAAUTT-3'<br>Antisense: 5'-AUUAUUCAGGUUGACUAGGTT-3'   |
| CYP1A1 siRNA-3 | Sense: 5'-GCUGGAUGAGAACGCCAAUTT-3'<br>Antisense: 5'-AUUGGCGUUCUCAUCCAGCTT-3'   |
| ABCG2 siRNA-1  | Sense: 5'-GGAGGCAAUCUUCGUUAUTT-3'<br>Antisense: 5'-AUAACGAAGAUUUGCCUCCTT-3'    |
| ABCG2 siRNA-2  | Sense: 5'-GGCCUUGGGAUACUUUGAATT-3'<br>Antisense: 5'-UUCAAAGUAUCCCAAGGCCTT-3'   |
| ABCG2 siRNA-3  | Sense: 5'-GCCUACCUGAAAUUGUUAUTT-3'<br>Antisense: 5'-AUAACAAUUCAGGUAGGCTT-3'    |
| Control siRNA  | Sense: 5'-UUCUCC- GAACGUGUCACGUTT-3'<br>Antisense: 5'-ACGUGACACGUUCGGAGAATT-3' |

**Supplement Table S2. Sequences of siRNAs targeting CYP1A1 and ABCG2.**
